# Supplementary material
Source: MDPI journal article supplement (https://www.mdpi.com/2071-1050/14/13/7742)
Supplement: s1 [file s1]

# Looking for a simple assessment tool for a complex task: short-term evaluation of changes in fisheries management measures in the Pomo Pits area (Adriatic Sea)

Matteo Chiarini<sup>1,2</sup>, Stefano Guicciardi<sup>1</sup>, Lorenzo Zacchetti<sup>1</sup>, Filippo Domenichetti<sup>1</sup>, Silvia Angelini<sup>1,3</sup>, Andrea Belardinelli<sup>1</sup>, Giovanni Canduci<sup>1</sup>, Camilla Croci<sup>1</sup>, Giordano Giuliani<sup>1</sup>, Alberto Santojanni<sup>1</sup>, Paolo Scarpini<sup>1</sup>, Damir Medvešek<sup>4</sup>, Igor Isajlovic<sup>4</sup>, Nedo Vrgoč<sup>4</sup> and Michela Martinelli<sup>1,\*</sup>

<sup>1</sup> National Research Council – Institute of Marine Biological Resources and Biotechnologies, Ancona (Italy)

<sup>2</sup> Department of Biological, Geological and Environmental Sciences, University of Bologna, Bologna (Italy)

<sup>3</sup> Fano Marine Center, The Inter-Institute Center for Research on Marine Biodiversity, Resources and Biotechnologies, Fano (Italy)

<sup>4</sup> Institute of Oceanography and Fisheries, Split (Croatia)

\* Correspondence: [michela.martinelli@cnr.it](mailto:michela.martinelli@cnr.it)

## Supplementary materials

**Table S1.** Acronyms table. References in square brackets referred to the main text.

| Acronym | Explanation               | Definition                                                                                                                                                     |
|---------|---------------------------|----------------------------------------------------------------------------------------------------------------------------------------------------------------|
| EFH     | Essential Fish Habitats   | areas in which fish spawning, breeding, feeding or growth to maturity occur [7]                                                                                |
| MPA     | Marine Protected Area     | a classic spatial management tool to protect marine biodiversity by limiting the effects of multiple human activities [6]                                      |
| FRA     | Fishery Protected Area    | areas in which restrictions on fishing effort and/or fishery ban have been implemented specifically to manage some important resource and/or protect EFHs [11] |
| NTZ     | No-Take Zones             | a type of MPA where all potentially damaging activities are prohibited [15]                                                                                    |
| PPA     | Partially Protected Areas | a type of MPA aiming to find a compromise between habitat preservation and human interests [16]                                                                |

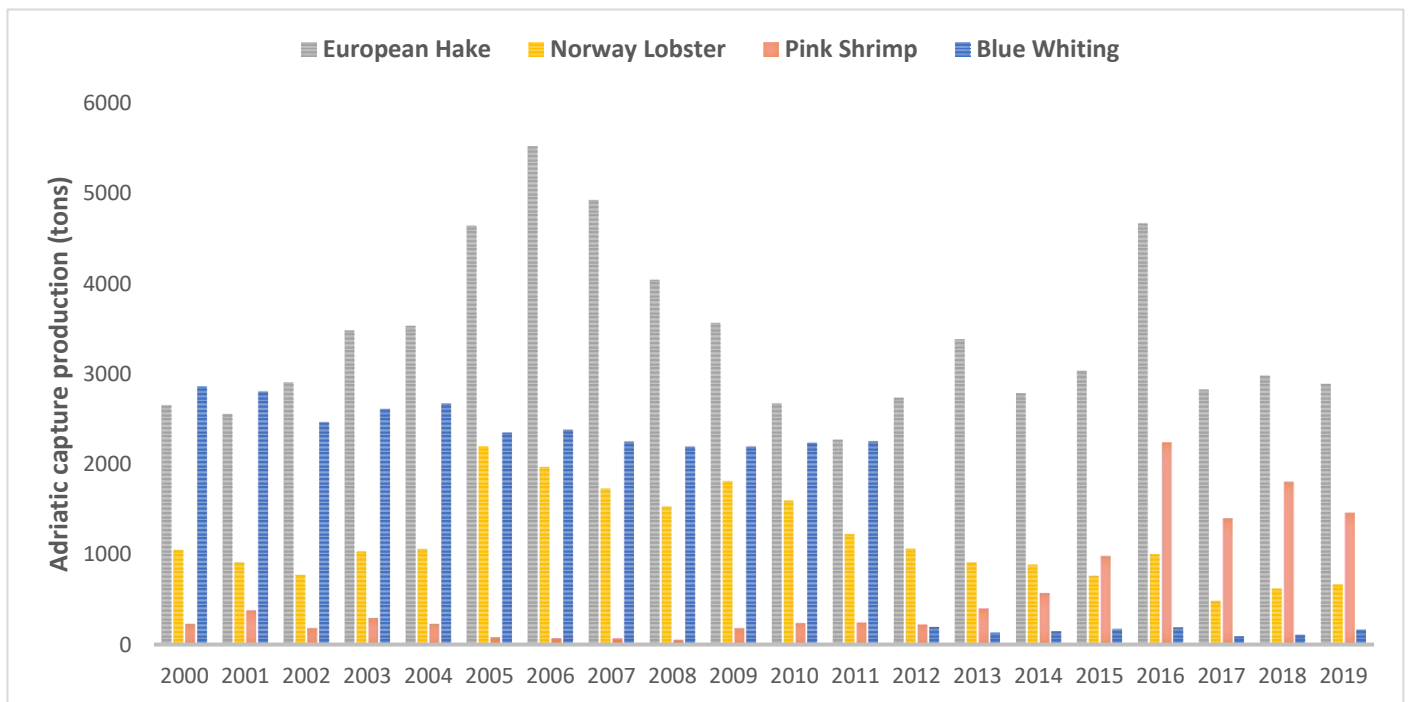

**Figure S1.** FAO-GFCM Adriatic Capture production (in tons) from 2000 to 2020 for European Hake (grey), Norway lobster (yellow), Pink Shrimp (red), and Blue Whiting (blue).

**Table S2.** Parametric one-way ANOVA for biomass ( $\text{kg}/\text{km}^2$ ) and density ( $\text{N}/\text{km}^2$ ) indices of *Nephrops norvegicus* by *Closure* factor for strata “A”, “B” and “ext ITA”. Analysis of the variance of both CPUE indices (biomass index above, density index below) by area (“A”, “B”, “ext ITA”) across the three levels of the *Closure* factor for *Nephrops norvegicus*. “*Closure*” is the factor, “Df” is the number of degree of freedom, “Sum Sq” represents the sums of squares, “Mean Sq” is the mean of squares, “F” is the ratio of the sum of squares, “Pr(>F)” is the combination of the F-statistic with the degrees of freedom. The asterisk (\*) refers to the level of significance.

| CPUE index    | Area      |                | Df | Sum Sq    | Mean Sq  | F      | Pr(>F)    |
|---------------|-----------|----------------|----|-----------|----------|--------|-----------|
| Biomass index | “A”       | <i>Closure</i> | 2  | 12740     | 6370     | 10.35  | 0.00174** |
|               |           | Residuals      | 14 | 8616      | 615      |        |           |
|               | “B”       | <i>Closure</i> | 2  | 305       | 152.7    | 0.452  | 0.64      |
|               |           | Residuals      | 40 | 13512     | 337.8    |        |           |
|               | “ext ITA” | <i>Closure</i> | 2  | 3292      | 1646.0   | 3.507  | 0.0485*   |
|               |           | Residuals      | 21 | 9855      | 469.3    |        |           |
| Density index | “A”       | <i>Closure</i> | 2  | 31266327  | 15633163 | 7.44   | 0.00629** |
|               |           | Residuals      | 14 | 29416444  | 2101175  |        |           |
|               | “B”       | <i>Closure</i> | 2  | 7105754   | 3552877  | 1.709  | 0.194     |
|               |           | Residuals      | 40 | 83146953  | 2078674  |        |           |
|               | “ext ITA” | <i>Closure</i> | 2  | 82906158  | 41453079 | 4.9917 | 0.01684*  |
|               |           | Residuals      | 21 | 174391574 | 8304361  |        |           |

**Table S3.** Parametric one-way ANOVA for biomass ( $\text{kg}/\text{km}^2$ ) and density ( $\text{N}/\text{km}^2$ ) indices of *Merluccius merluccius* by *Closure* factor for strata “A”, “B” and “ext ITA”. Analysis of the variance of both CPUE indices (biomass index above, density index below) by area (“A”, “B”, “ext ITA”) across the three levels of the *Closure* factor for *Merluccius merluccius*. “*Closure*” is the factor, “Df” is the

number of degree of freedom, “Sum Sq” represents the sums of squares, “Mean Sq” is the mean of squares, “F” is the ratio of the sum of squares, “Pr(>F)” is the combination of the F-statistic with the degrees of freedom. The asterisk (\*) refers to the level of significance.

| CPUE index    | Area      |                | Df | Sum Sq    | Mean Sq   | F     | Pr(>F)      |
|---------------|-----------|----------------|----|-----------|-----------|-------|-------------|
| Biomass index | “A”       | <i>Closure</i> | 2  | 66005     | 33002     | 11.99 | 0.000925*** |
|               |           | Residuals      | 14 | 38541     | 2753      |       |             |
|               | “B”       | <i>Closure</i> | 2  | 20115     | 10057     | 4.055 | 0.0249*     |
|               |           | Residuals      | 40 | 99204     | 2480      |       |             |
|               | “ext ITA” | <i>Closure</i> | 2  | 5102      | 2551      | 2.007 | 0.159       |
|               |           | Residuals      | 21 | 26692     | 1271      |       |             |
| Density index | “A”       | <i>Closure</i> | 2  | 326475378 | 163237689 | 13.12 | 0.000617*** |
|               |           | Residuals      | 14 | 174184408 | 12441743  |       |             |
|               | “B”       | <i>Closure</i> | 2  | 80081735  | 40040867  | 3.223 | 0.0504      |
|               |           | Residuals      | 40 | 496990709 | 12424768  |       |             |
|               | “ext ITA” | <i>Closure</i> | 2  | 26287903  | 13143952  | 1.412 | 0.266       |
|               |           | Residuals      | 21 | 195474073 | 9308289   |       |             |

**Table S4.** Parametric one-way ANOVA for biomass (kg/km<sup>2</sup>) and density (N/km<sup>2</sup>) indices of *Parapeneus longirostris* by *Closure* factor for strata “A”, “B” and “ext ITA”. Analysis of the variance of both CPUE indices (biomass index above, density index below) by area (“A”, “B”, “ext ITA”) across the three levels of the *Closure* factor for *Parapeneus longirostris*. “*Closure*” is the factor, “Df” is the number of degree of freedom, “Sum Sq” represents the sums of squares, “Mean Sq” is the mean of squares, “F” is the ratio of the sum of squares, “Pr(>F)” is the combination of the F-statistic with the degrees of freedom. The asterisk (\*) refers to the level of significance.

| CPUE index    | Area      |                | Df | Sum Sq        | Mean Sq      | F     | Pr(>F)      |
|---------------|-----------|----------------|----|---------------|--------------|-------|-------------|
| Biomass index | “A”       | <i>Closure</i> | 2  | 209287        | 104644       | 16.42 | 0.000213*** |
|               |           | Residuals      | 14 | 89224         | 6373         |       |             |
|               | “B”       | <i>Closure</i> | 2  | 16984.39      | 8492.2       | 8.27  | 0.001       |
|               |           | Residuals      | 40 | 41096.47      | 1027.41      |       |             |
|               | “ext ITA” | <i>Closure</i> | 2  | 54724.67      | 27362.33     | 5.62  | 0.011       |
|               |           | Residuals      | 21 | 102328.02     | 4872.76      |       |             |
| Density index | “A”       | <i>Closure</i> | 2  | 6.823e+09     | 3.411e+09    | 13.85 | 0.000481*** |
|               |           | Residuals      | 14 | 3.449e+09     | 2.463e+08    |       |             |
|               | “B”       | <i>Closure</i> | 2  | 821385025.13  | 410692512.56 | 7.17  | 0.002       |
|               |           | Residuals      | 40 | 2290477144.48 | 57261928.61  |       |             |
|               | “ext ITA” | <i>Closure</i> | 2  | 7.267e+09     | 3.634e+09    | 3.035 | 0.0695      |
|               |           | Residuals      | 21 | 2.514e+09     | 1.197e+09    |       |             |

**Table S5.** Parametric one-way ANOVA for biomass (kg/km<sup>2</sup>) and density (N/km<sup>2</sup>) indices of *Micromesistius poutassou* by *Closure* factor for strata “A”, “B” and “ext ITA”. Analysis of the variance of both CPUE indices (biomass index above, density index below) by area (“A”, “B”, “ext ITA”) across the three levels of the *Closure* factor for *Micromesistius poutassou*. “*Closure*” is the factor, “Df” is the number of degree of freedom, “Sum Sq” represents the sums of squares, “Mean Sq” is the mean of squares, “F” is the ratio of the sum of squares, “Pr(>F)” is the combination of the F-statistic with the degrees of freedom. The asterisk (\*) refers to the level of significance.

| CPUE index    | Area      |                | Df | Sum Sq    | Mean Sq | F     | Pr(>F)  |
|---------------|-----------|----------------|----|-----------|---------|-------|---------|
| Biomass index | “A”       | <i>Closure</i> | 2  | 13506     | 6753    | 0.395 | 0.681   |
|               |           | Residuals      | 14 | 239193    | 17085   |       |         |
|               | “B”       | <i>Closure</i> | 2  | 1308      | 654.2   | 0.583 | 0.563   |
|               |           | Residuals      | 40 | 44895     | 1122.4  |       |         |
|               | “ext ITA” | <i>Closure</i> | 2  | 1626      | 812.8   | 3.983 | 0.0342* |
|               |           | Residuals      | 21 | 4286      | 204.1   |       |         |
| Density index | “A”       | <i>Closure</i> | 2  | 1800852   | 900426  | 0.279 | 0.76    |
|               |           | Residuals      | 14 | 45128323  | 3223452 |       |         |
|               | “B”       | <i>Closure</i> | 2  | 3034463   | 1517231 | 0.334 | 0.718   |
|               |           | Residuals      | 40 | 181639265 | 4540982 |       |         |
|               | “ext ITA” | <i>Closure</i> | 2  | 4236799   | 2118399 | 0.36  | 0.702   |
|               |           | Residuals      | 21 | 123596520 | 5885549 |       |         |

**Table S6.** Parametric one-way ANOVA for biomass (kg/km<sup>2</sup>) and density (N/km<sup>2</sup>) indices of *Munida spp.* by *Closure* factor for strata “A”, “B” and “ext ITA”. Analysis of the variance of both CPUE indices (biomass index above, density index below) by area (“A”, “B”, “ext ITA”) across the three levels of the *Closure* factor for *Munida spp.* “*Closure*” is the factor, “Df” is the number of degree of freedom, “Sum Sq” represents the sums of squares, “Mean Sq” is the mean of squares, “F” is the ratio of the sum of squares, “Pr(>F)” is the combination of the F-statistic with the degrees of freedom. The asterisk (\*) refers to the level of significance.

| CPUE index    | Area      |                | Df | Sum Sq         | Mean Sq       | F     | Pr(>F)  |
|---------------|-----------|----------------|----|----------------|---------------|-------|---------|
| Biomass index | “A”       | <i>Closure</i> | 2  | 15243          | 7622          | 0.406 | 0.674   |
|               |           | Residuals      | 14 | 262503         | 18750         |       |         |
|               | “B”       | <i>Closure</i> | 2  | 58295          | 29148         | 1.412 | 0.256   |
|               |           | Residuals      | 40 | 825656         | 20641         |       |         |
|               | “ext ITA” | <i>Closure</i> | 2  | 32482          | 146241        | 4.336 | 0.0409* |
|               |           | Residuals      | 11 | 41203          | 3746          |       |         |
| Density index | “A”       | <i>Closure</i> | 2  | 5.060e+09      | 2.530e+09     | 0.347 | 0.722   |
|               |           | Residuals      | 5  | 3.641e+10      | 7.282e+09     |       |         |
|               | “B”       | <i>Closure</i> | 2  | 1.861e+10      | 9.307e+09     | 1.596 | 0.216   |
|               |           | Residuals      | 37 | 2.157e+11      | 5.830e+09     |       |         |
|               | “ext ITA” | <i>Closure</i> | 2  | 13484092608.82 | 6742046304.41 | 4.36  | 0.036   |
|               |           | Residuals      | 13 | 20097465115.76 | 1545958855.06 |       |         |
